# Supplementary material
Source: PubMed Central journal article supplement (PMC5312626)
Supplement: Supp_Fig2.pdf [file Supp_Fig2.pdf]

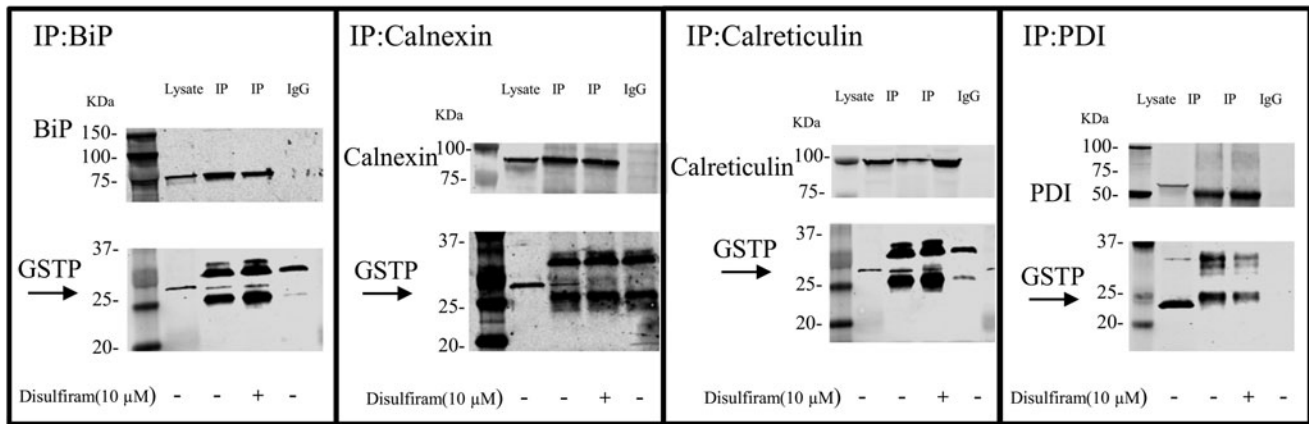

**SUPPLEMENTARY FIG. S2. Full blots with molecular markers of those from Figure 3B.** BiP, immunoglobulin heavy chain-binding protein; GSTP, glutathione S-transferase; IgG, immunoglobulin G; IP, immunoprecipitation; PDI, protein disulfide isomerase.
