# Supplementary material
Source: PubMed Central journal article supplement (PMC5312626)
Supplement: Supp_Fig3.pdf [file Supp_Fig3.pdf]

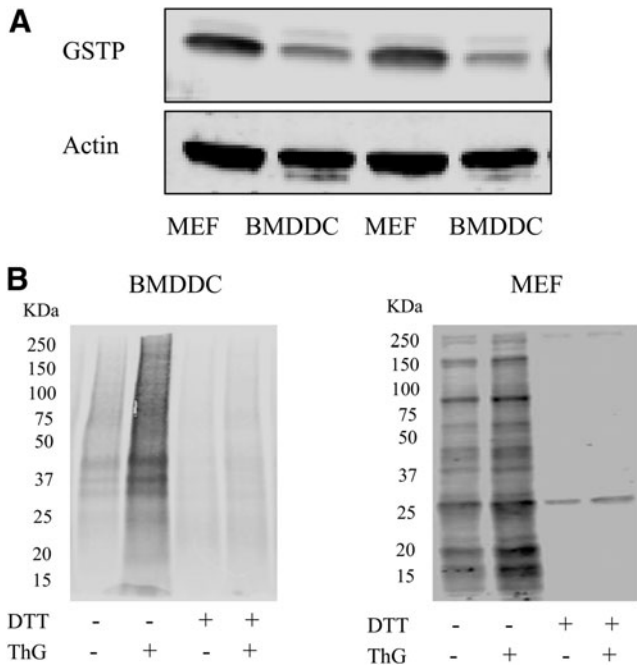

**SUPPLEMENTARY FIG. S3. Thapsigargin (ThG) induced S-glutathionylation in BMDDC and MEF cell. (A)** GSTP expression in BMDDC and MEF cells. Twenty-five micrograms of proteins from BMDDC or MEF cells was subject to SDS-PAGE under reducing conditions and blotted for anti-GSTP and anti-actin. **(B)** Global S-glutathionylation levels induced by ThG in BMDDC or MEF cells were quantified after deglutathionylation by glutaredoxin (see "Materials and Methods"). The cell lysates were treated with the reductant DTT before the procedure of deglutathionylation. The regenerated free thiols were quantified by immunoblotting using streptavidin secondary antibodies after labeling with maleimide-PEG11-Biotin. BMDDC, bone marrow-derived dendritic cells; DTT, dithiothreitol; MEF, mouse embryo fibroblast; ThG, thapsigargin.
