# Supplementary material
Source: PubMed Central journal article supplement (PMC5312626)
Supplement: Supp_Fig4.pdf [file Supp_Fig4.pdf]

## BMDDC

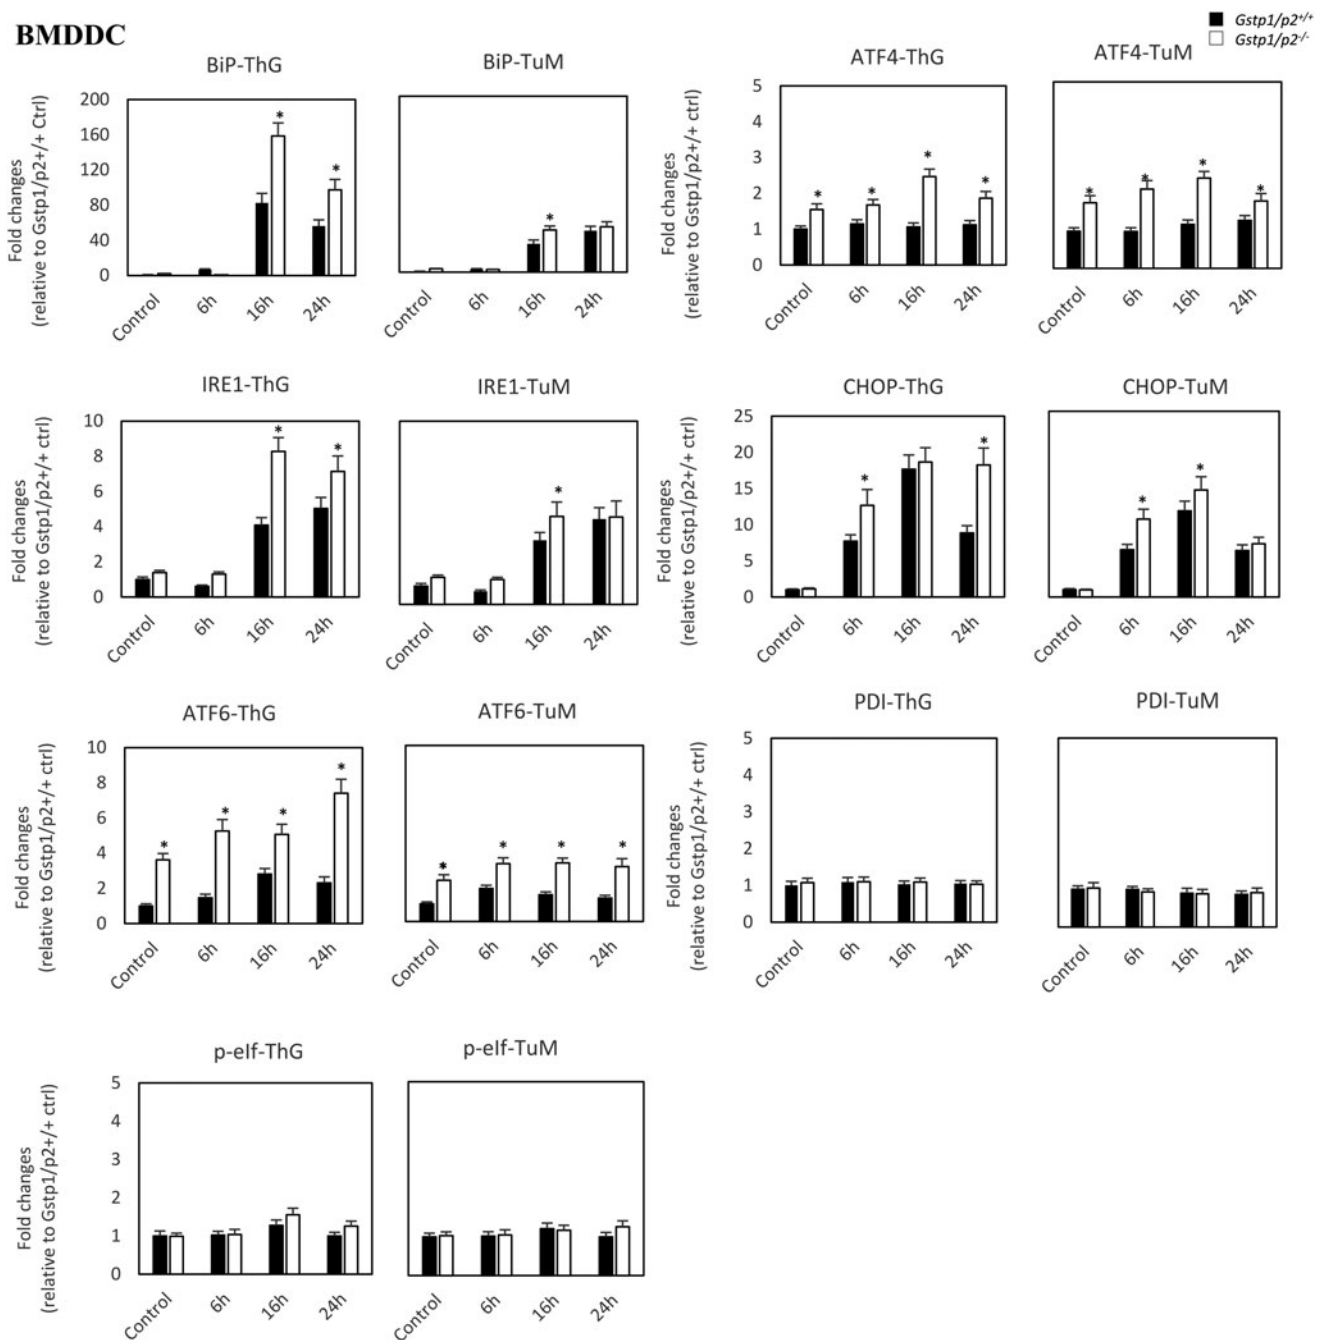

**SUPPLEMENTARY FIG. S4. Densitometric analyses of the blots in Figure 5A and B.** Bars represent the mean ( $\pm$ SD) from three independent experiments. \*Represents significant difference between *Gstp1/p2<sup>+/+</sup>* and *Gstp1/p2<sup>-/-</sup>* mice. ATF, activating transcription factor; BiP, immunoglobulin heavy chain-binding protein; BMDDC, bone marrow derived dendritic cells; CHOP, C/EBP homologous protein; eIF2 $\alpha$ , a subunit of the regulating initiator of the mRNA translation machinery; IRE1, inositol-requiring protein-1; PDI, protein disulfide isomerase; ThG, thapsigargin; TuM, tunicamycin; UPR, unfolded protein response.
